# Supplementary material for: Composite of perovskite and fluorite fuel electrodes for efficient carbon dioxide electrolysis in solid oxide electrolyzer cells
Source: Royal Society of Chemistry journal article supplement (doi:10.1039/d4ta02988g), 2024-01-01
Supplement: d4ta02988g1.pdf [file d4ta02988g1.pdf]

## **Supplementary Materials**

### **Composite of Perovskite and Fluorite Fuel Electrodes for Efficient Carbon Dioxide electrolysis in Solid Oxide Electrolyzer Cells**

Hao-Yang Li and Pei-Chen Su\*

School of Mechanical and Aerospace Engineering,  
Nanyang Technological University, 50 Nanyang  
Avenue, 639798, Singapore

\*Corresponding author: [peichensu@ntu.edu.sg](mailto:peichensu@ntu.edu.sg)

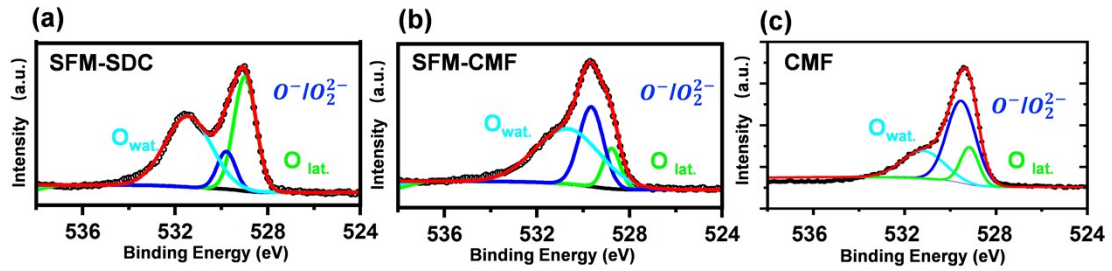

**Fig. S1** - XPS spectra of O 1s on (a) SFM-SDC, (b) SFM-CMF, (c) CMF electrodes.

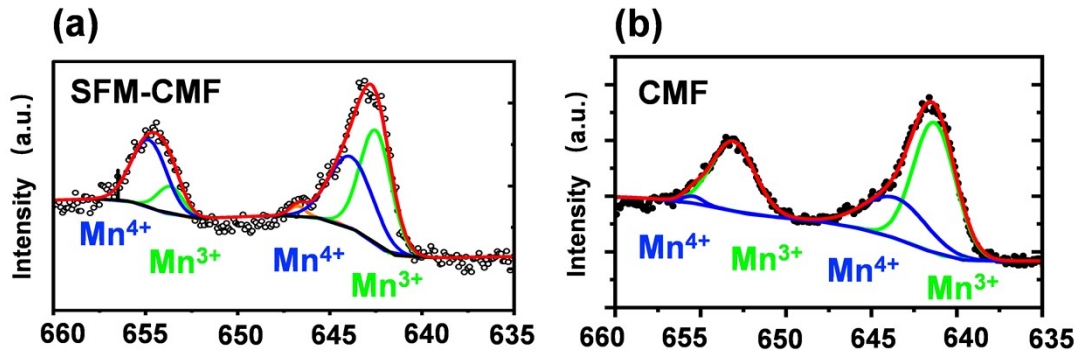

**Fig. S2** - XPS spectra of Mn 2p on (a) SFM-CMF, (b) CMF electrodes.

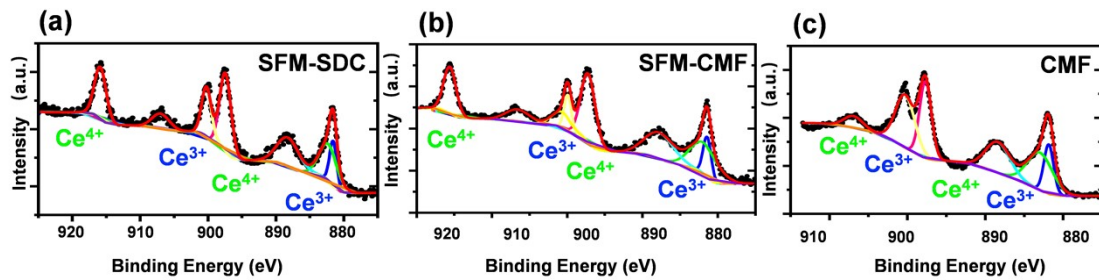

**Fig. S3** - XPS spectra of Ce 3d on (a) SFM-SDC, (b) SFM-CMF, (c) CMF electrodes.

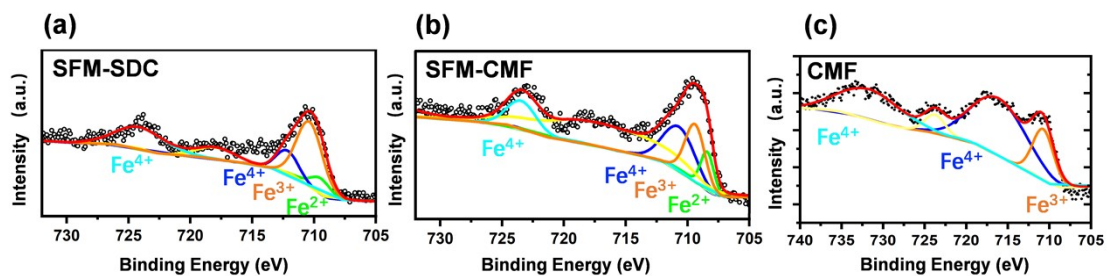

**Fig. S4** - XPS spectra of Fe 2p<sub>3/2</sub> on (a) SFM-SDC, (b) SFM-CMF, (c) CMF electrodes.

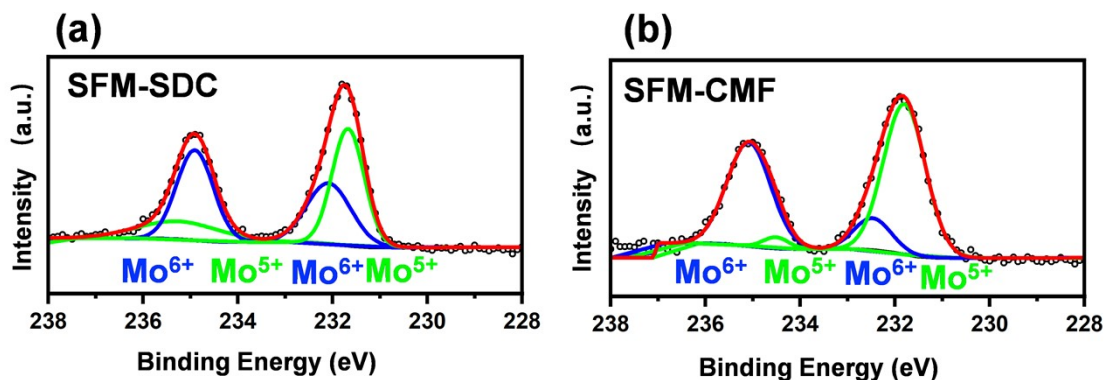

**Fig. S5** - XPS spectra of Mo 3d<sub>5/2</sub> on (a) SFM-SDC, (b) SFM-CMF electrodes.

**Table S1** - Atomic ratio of Fe ions at different valence-states in SFM-CMF (weigh ratio = 6:4) electrodes.

|                    | Fe <sup>4+</sup> | Fe <sup>3+</sup> | Fe <sup>2+</sup> | Average valence |
|--------------------|------------------|------------------|------------------|-----------------|
| <b>Theoretical</b> | 44 at. %         | 34 at. %         | 22 at. %         | 3.2             |
| <b>Practical</b>   | 56 at. %         | 29 at. %         | 15 at. %         | 3.4             |

Theoretical: Mathematical calculation, data from XPS results of SFM<sup>1</sup> and CMF (Fig. - S5)

Practical: XPS characterization result. (Fig. 3d)

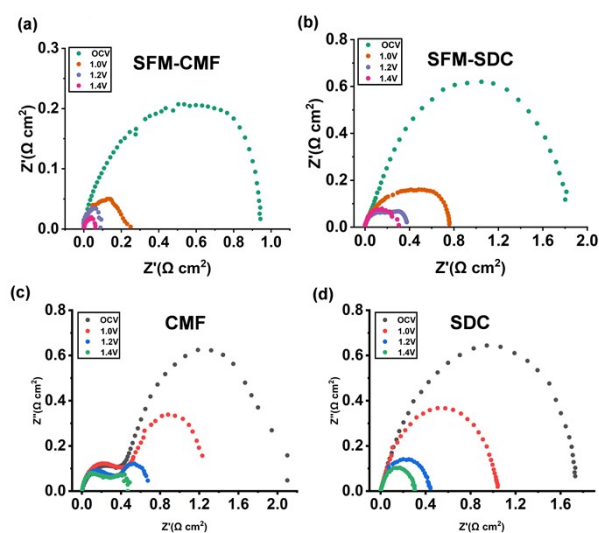

**Fig. S6** - EIS of cells from OCV to 1.4 V at 1073 K with (a) SFM-CMF, (b) SFM-SDC, (c) CMF, (d) SDC as cathode

**Table S2.** Comparison of the properties with state-of-the-art electrolyzers for pure CO<sub>2</sub> electrolysis at 1073K. Polarization resistances ( $R_p$ ) was collected at 1.2 V, and current density at 1.6 V.

| <b>Cells configuration</b>                        | <b><math>R_p</math> (<math>\Omega</math> cm<sup>-2</sup>)</b> | <b>Current Density (A cm<sup>-2</sup>)</b> | <b>Durability</b>                                                 | <b>References</b> |
|---------------------------------------------------|---------------------------------------------------------------|--------------------------------------------|-------------------------------------------------------------------|-------------------|
| Ni-YSZ YSZ RuO <sub>2</sub> @LSM-YSZ              | ~0.4                                                          | 0.927                                      | Unstable.                                                         | 2                 |
| FeNi <sub>3</sub> @SFMN-GDC LDC/LSGM <br>LSCF-GDC | 0.42                                                          | 0.93                                       | 18% degradation under 0.934 A cm <sup>-2</sup> for 20min          | 3                 |
| SFM-SDC LDC/LSGM LSCF-SDC                         | 0.19@1.5V                                                     | 1.09                                       | Relatively stable under ~1 A cm <sup>-2</sup> for 20min           | 1                 |
| CoFe@SFMC-GDC LDC/LSGM <br>BSCF-GDC               | 0.12                                                          | 1.20                                       | Stable under ~1 A cm <sup>-2</sup> for 20min                      | 4                 |
| SFNM+1.2Fe-GDC GDC/LSGM <br>LSCF-GDC (850°C)      | 0.2453<br>(CO/CO <sub>2</sub> )                               | 1.13                                       | ~30% degradation under ~1 A cm <sup>-2</sup> for 40 hour          | 5                 |
| RuFe@SFRuM-GDC LSGM  BSCF-<br>GDC                 | 0.11                                                          | 2.25                                       | ~30% degradation under ~0.6 A cm <sup>-2</sup> for 100 hour       | 6                 |
| Ni-Fe-LSFM LSGM BLC                               | ~2                                                            | 2.32                                       | Conduct 100h electrolysis at 0.5A                                 | 7                 |
| CoFe@LSCFM-GDC LDC/LSGM <br>BSCF-GDC              | 0.15                                                          | 2.40                                       | ~30% degradation under ~0.6 A cm <sup>-2</sup> for 100 hour       | 8                 |
| <b>SFM-CMF LSGM  SSC-SDC</b>                      | <b>0.089</b><br><b>(CO/CO<sub>2</sub>)</b>                    | <b>3.02</b>                                | <b>13.4% degradation under ~1.0 A cm<sup>-2</sup> for 40 hour</b> | <b>This work</b>  |

## References

1. Y. Li, X. Chen, Y. Yang, Y. Jiang and C. Xia, *ACS Sustainable Chemistry & Engineering*, 2017, **5**, 11403-11412.
2. Y. Song, Z. Zhou, X. Zhang, Y. Zhou, H. Gong, H. Lv, Q. Liu, G. Wang and X. Bao, *Journal of Materials Chemistry A*, 2018, **6**, 13661-13667.
3. H. Lv, L. Lin, X. Zhang, D. Gao, Y. Song, Y. Zhou, Q. Liu, G. Wang and X. Bao, *Journal of Materials Chemistry A*, 2019, **7**, 11967-11975.
4. H. Lv, L. Lin, X. Zhang, Y. Song, H. Matsumoto, C. Zeng, N. Ta, W. Liu, D. Gao and G. Wang, *Advanced Materials*, 2020, **32**, 1906193.
5. B.-W. Zhang, M.-N. Zhu, M.-R. Gao, X. Xi, N. Duan, Z. Chen, R.-F. Feng, H. Zeng and J.-L. Luo, *Nature communications*, 2022, **13**, 1-12.
6. H. Lv, L. Lin, X. Zhang, R. Li, Y. Song, H. Matsumoto, N. Ta, C. Zeng, Q. Fu and G. Wang, *Nature communications*, 2021, **12**, 1-11.
7. S. Wang, H. Tsuruta, M. Asanuma and T. Ishihara, *Advanced Energy Materials*, 2015, **5**, 1401003.
8. H. Lv, T. Liu, X. Zhang, Y. Song, H. Matsumoto, N. Ta, C. Zeng, G. Wang and X. Bao, *Angewandte Chemie International Edition*, 2020, **59**, 15968-15973.
